# Supplementary material for: The Psychometric Properties of the Chinese eHealth Literacy Scale (C-eHEALS) in a Chinese Rural Population: Cross-Sectional Validation Study
Source: PubMed Central journal article supplement (PMC6914234; doi:10.2196/15720), 2019-10-22
Supplement: jmir_v21i10e15720_app1.pdf [file jmir_v21i10e15720_app1.pdf]

## Multimedia Appendix 1: The simplified Chinese version of *eHealth Literacy Scale* (eHEALS)

对于以下陈述，请选择最符合您情况的数字（请逐一评价）

|                                   | 非常不同意 | 不同意 | 不确定 | 同意 | 非常同意 |
|-----------------------------------|-------|-----|-----|----|------|
| C-eHEALS1:我知道网上可以找到什么样的健康资源.....  | 1□    | 2□  | 3□  | 4□ | 5□   |
| C-eHEALS2:我知道网上去哪可以找到有用的健康资源....  | 1□    | 2□  | 3□  | 4□ | 5□   |
| C-eHEALS3:我知道如何在网上找到有用的健康资源.....  | 1□    | 2□  | 3□  | 4□ | 5□   |
| C-eHEALS4:我知道怎样利用网络来解答自己的健康问题.    | 1□    | 2□  | 3□  | 4□ | 5□   |
| C-eHEALS5:我知道如何利用网上的健康信息来帮助自己.    | 1□    | 2□  | 3□  | 4□ | 5□   |
| C-eHEALS6:我具备评价网上健康资源好坏的能力.....   | 1□    | 2□  | 3□  | 4□ | 5□   |
| C-eHEALS7:我能区分高质量与低质量的网上健康资源..... | 1□    | 2□  | 3□  | 4□ | 5□   |
| C-eHEALS8:我有使用网络信息来做出健康决策的自信..... | 1□    | 2□  | 3□  | 4□ | 5□   |
